# Supplementary material for: Acacetin Inhibits the Growth of STAT3-Activated DU145 Prostate Cancer Cells by Directly Binding to Signal Transducer and Activator of Transcription 3 (STAT3)
Source: MDPI journal article supplement (doi:10.3390/molecules26206204), 2021-10-14
Supplement: s1 [file s1]

## Supplementary Material

# Acacetin Inhibits the Growth of STAT3-Activated DU145 Prostate Cancer Cells by Directly Binding to Signal Transducer and Activator of Transcription 3 (STAT3)

Sun Yun, Yu-Jin Lee, Jiyeon Choi, Nam Doo Kim, Dong Cho Han and Byoung-Mog Kwon

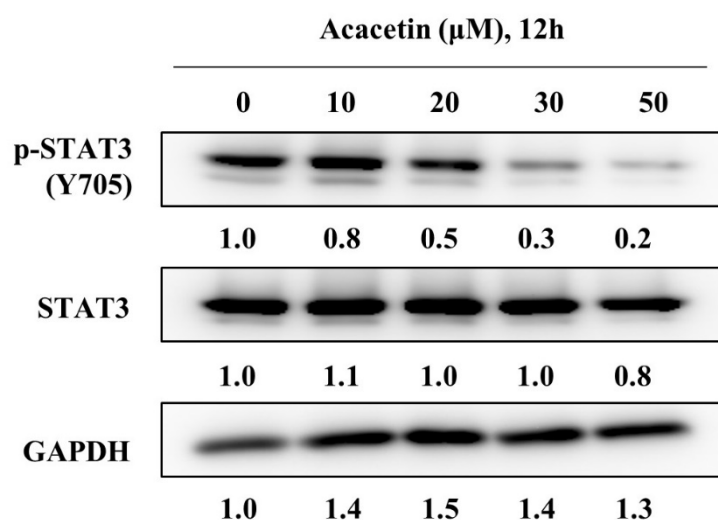

**Figure S1.** Acacetin inhibits p-STAT3-Y705 in HCC827. HCC827 cells were treated with acacetin for 12 h; whole lysate was obtained and analyzed by western blotting with p-STAT3 (Y705) and STAT3 antibodies. The band intensity of each protein was quantified using the Multi Gauge program.

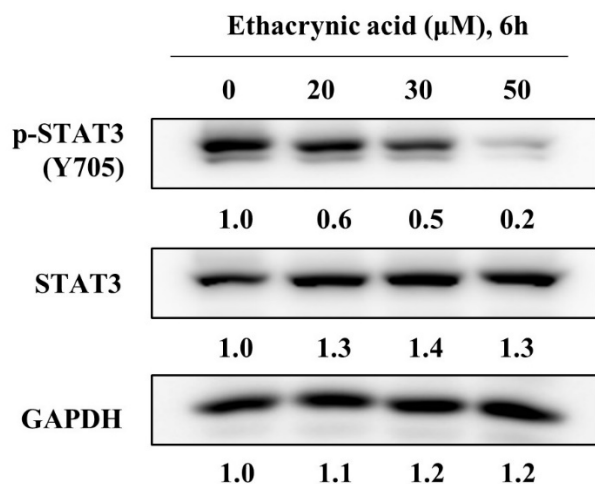

**Figure S2.** Ethacrynic acid inhibits p-STAT3-Y705 in DU145. DU145 cells were treated with ethacrynic acid for 6 h; whole lysate was obtained and analyzed by western blotting with p-STAT3 (Y705) and STAT3 antibodies. The band intensity of each protein was quantified using the Multi Gauge program
